# Supplementary material
Source: PubMed Central journal article supplement (PMC6703856)
Supplement: NIHMS1035754-supplement-Supplementary_Information.pdf [file NIHMS1035754-supplement-Supplementary_Information.pdf]

# Both Ligands and Macromolecular Crowders Preferentially Bind to Closed Conformations of Maltose Binding Protein

*Archishman Ghosh<sup>†‡</sup>, Pieter E. S. Smith<sup>†</sup>, Sanbo Qin<sup>†‡</sup>, Myunggi Yi<sup>§</sup>, and Huan-Xiang Zhou<sup>†‡\*</sup>*

<sup>†</sup> Institute of Molecular Biophysics, Florida State University, Tallahassee, Florida 30302, United States

<sup>‡</sup> Department of Chemistry and Department of Physics, University of Illinois at Chicago, Chicago, Illinois 60607, United States

<sup>§</sup> Department of Biomedical Engineering, Pukyong National University, Busan, 48513, South Korea

\*E-mail: hzhou43@uic.edu

*Supporting Information*

Table S1. Parameters from fitting of titration data

| <i>Two-state model for wild-type MBP<sup>a</sup></i>   |                                                     |                                 |                                    |
|--------------------------------------------------------|-----------------------------------------------------|---------------------------------|------------------------------------|
| Titrant                                                | $K_{d:app}$ ( $\mu$ M) or $K_d^C$ (mM) <sup>b</sup> | $\lambda_f$ or $\lambda_p$ (nm) | $\lambda_b$ or $\lambda_{CP}$ (nm) |
| Maltose ([C] <sub>T</sub> =0)                          | <b>1.2 ± 0.1<sup>c</sup></b>                        | <b>345.8 ± 0.1</b>              | <b>350.0 ± 0.1</b>                 |
| Maltose ([C] <sub>T</sub> =100 g/L)                    | 1.9 ± 0.3                                           | 344.0 ± 0.1                     | 349.8 ± 0.2                        |
| Maltose ([C] <sub>T</sub> =200 g/L)                    | 3.9 ± 0.2                                           | 343.0 ± 0.1                     | 349.9 ± 0.1                        |
| Maltose ([C] <sub>T</sub> =300 g/L)                    | 8 ± 1                                               | 343.0 ± 0.1                     | 350.3 ± 0.1                        |
| Ficoll ([L] <sub>T</sub> =0)                           | <b>2.0 ± 0.5</b>                                    | <b>345.6 ± 0.1</b>              | <b>341.5 ± 0.4</b>                 |
| <i>Three-state model for wild-type MBP<sup>a</sup></i> |                                                     |                                 |                                    |
|                                                        | $K_d$ ( $\mu$ M) or $K_d^C$ (mM)                    | $\lambda_p$ (nm)                | $\lambda_b$ or $\lambda_{CP}$ (nm) |
| Maltose and Ficoll                                     | <b>1.3 ± 0.1</b>                                    | <b>345.8 ± 0.1</b>              | <b>350.0 ± 0.1</b>                 |
|                                                        | <b>1.5 ± 0.2</b>                                    |                                 | <b>341.8 ± 0.2</b>                 |
| <i>Two-state model for A96F</i>                        |                                                     |                                 |                                    |
| Maltose ([C] <sub>T</sub> =0)                          | <b>0.33 ± 0.05</b>                                  | <b>345.9 ± 0.1</b>              | <b>349.3 ± 0.1</b>                 |
| Maltose ([C] <sub>T</sub> =50 g/L)                     | 0.67 ± 0.05                                         | 344.0 ± 0.1                     | 349.4 ± 0.1                        |
| Maltose ([C] <sub>T</sub> =100 g/L)                    | 0.91 ± 0.09                                         | 343.5 ± 0.1                     | 349.2 ± 0.1                        |
| Maltose ([C] <sub>T</sub> =200 g/L)                    | 1.6 ± 0.2                                           | 342.6 ± 0.1                     | 349.7 ± 0.2                        |
| Maltose ([C] <sub>T</sub> =300 g/L)                    | 2.2 ± 0.1                                           | 341.8 ± 0.1                     | 349.6 ± 0.1                        |
| Ficoll ([L] <sub>T</sub> =0)                           | <b>0.54 ± 0.09</b>                                  | <b>346.1 ± 0.3</b>              | <b>342.3 ± 0.2</b>                 |
| <i>Three-state model for A96F</i>                      |                                                     |                                 |                                    |
| Maltose and Ficoll                                     | <b>0.42 ± 0.04</b>                                  | <b>346.1 ± 0.1</b>              | <b>349.4 ± 0.1</b>                 |
|                                                        | <b>0.91 ± 0.09</b>                                  |                                 | <b>343.2 ± 0.1</b>                 |
| <i>Two-state model for A96W</i>                        |                                                     |                                 |                                    |
| Maltose ([C] <sub>T</sub> =0)                          | <b>0.036 ± 0.006</b>                                | <b>346.5 ± 0.1</b>              | <b>349.3 ± 0.1</b>                 |
| Maltose ([C] <sub>T</sub> =100 g/L)                    | 0.053 ± 0.003                                       | 344.0 ± 0.04                    | 349.3 ± 0.04                       |
| Maltose ([C] <sub>T</sub> =200 g/L)                    | 0.097 ± 0.010                                       | 343.5 ± 0.1                     | 349.1 ± 0.1                        |
| Maltose ([C] <sub>T</sub> =300 g/L)                    | 0.22 ± 0.02                                         | 343.3 ± 0.1                     | 349.3 ± 0.1                        |
| Ficoll ([L] <sub>T</sub> =0)                           | <b>0.35 ± 0.04</b>                                  | <b>346.1 ± 0.2</b>              | <b>343.6 ± 0.1</b>                 |
| <i>Three-state model for A96W</i>                      |                                                     |                                 |                                    |
| Maltose and Ficoll                                     | <b>0.019 ± 0.002</b>                                | <b>346.4 ± 0.1</b>              | <b>349.3 ± 0.1</b>                 |
|                                                        | <b>0.47 ± 0.05</b>                                  |                                 | <b>343.2 ± 0.1</b>                 |
| <i>Two-state model for I329W</i>                       |                                                     |                                 |                                    |
| Maltose ([C] <sub>T</sub> =0)                          | <b>0.014 ± 0.009</b>                                | <b>346.4 ± 0.04</b>             | <b>349.7 ± 0.03</b>                |
| Maltose ([C] <sub>T</sub> =100 g/L)                    | 0.030 ± 0.006                                       | 344.4 ± 0.1                     | 350.1 ± 0.1                        |
| Maltose ([C] <sub>T</sub> =200 g/L)                    | 0.056 ± 0.011                                       | 344.4 ± 0.1                     | 350.6 ± 0.1                        |
| Maltose ([C] <sub>T</sub> =300 g/L)                    | 0.12 ± 0.01                                         | 343.6 ± 0.1                     | 350.8 ± 0.1                        |
| Ficoll ([L] <sub>T</sub> =0)                           | <b>0.65 ± 0.11</b>                                  | <b>346.4 ± 0.2</b>              | <b>343.1 ± 0.2</b>                 |

| <i>Three-state model for I329W</i> |                      |                    |                    |
|------------------------------------|----------------------|--------------------|--------------------|
| Maltose and Ficoll                 | <b>0.012 ± 0.002</b> | <b>346.4 ± 0.1</b> | <b>349.7 ± 0.1</b> |
|                                    | <b>0.70 ± 0.11</b>   |                    | <b>343.2 ± 0.1</b> |

| <i>Two-state model for A96W/I329W</i> |             |             |             |
|---------------------------------------|-------------|-------------|-------------|
| Ficoll ( $[L]_{T=0}$ )                | 0.45 ± 0.11 | 348.9 ± 0.3 | 345.9 ± 0.3 |

| <i>Two-state model for MBP-NBD in Ficoll70</i> |                                        |                                                  |  |
|------------------------------------------------|----------------------------------------|--------------------------------------------------|--|
|                                                | $K_{d,app}$ (μM)                       |                                                  |  |
|                                                | Peak wavelength with 280 nm excitation | Fluo. intensity at 550 nm with 500 nm excitation |  |
| Maltose ( $[C]_{T=0}$ )                        | 5.8 ± 0.4                              | 29 ± 1                                           |  |
| Maltose ( $[C]_{T=50}$ g/L)                    | 14 ± 1                                 | 30 ± 1                                           |  |
| Maltose ( $[C]_{T=100}$ g/L)                   | 30 ± 2                                 | 61 ± 1                                           |  |
| Maltose ( $[C]_{T=200}$ g/L)                   | 61 ± 3                                 | 145 ± 3                                          |  |

| <i>Two-state model for MBP-NBD in BSA</i> |  |          |  |
|-------------------------------------------|--|----------|--|
| Maltose ( $[C]_{T=0}$ )                   |  | 26 ± 0.7 |  |
| Maltose ( $[C]_{T=50}$ g/L)               |  | 219 ± 14 |  |
| Maltose ( $[C]_{T=100}$ g/L)              |  | 469 ± 22 |  |

<sup>a</sup>Taken from Miklos et al. (2013).

<sup>b</sup> $K_{d,app}$  (μM) applies to rows where maltose is the titrant;  $K_d^C$  (mM) applies to rows where Ficoll70 is the titrant.

<sup>c</sup>Bold entries are obtained in both two-state and three-state fits. Whereas the two-state model was used to independently fit five or six titration curves, the three-model in essence provides a constrained, simultaneous fit of all these titration curves. The degree of agreement between the corresponding parameters in the two- and three-state fits is thus a measure of the soundness of the three-state competitive model.

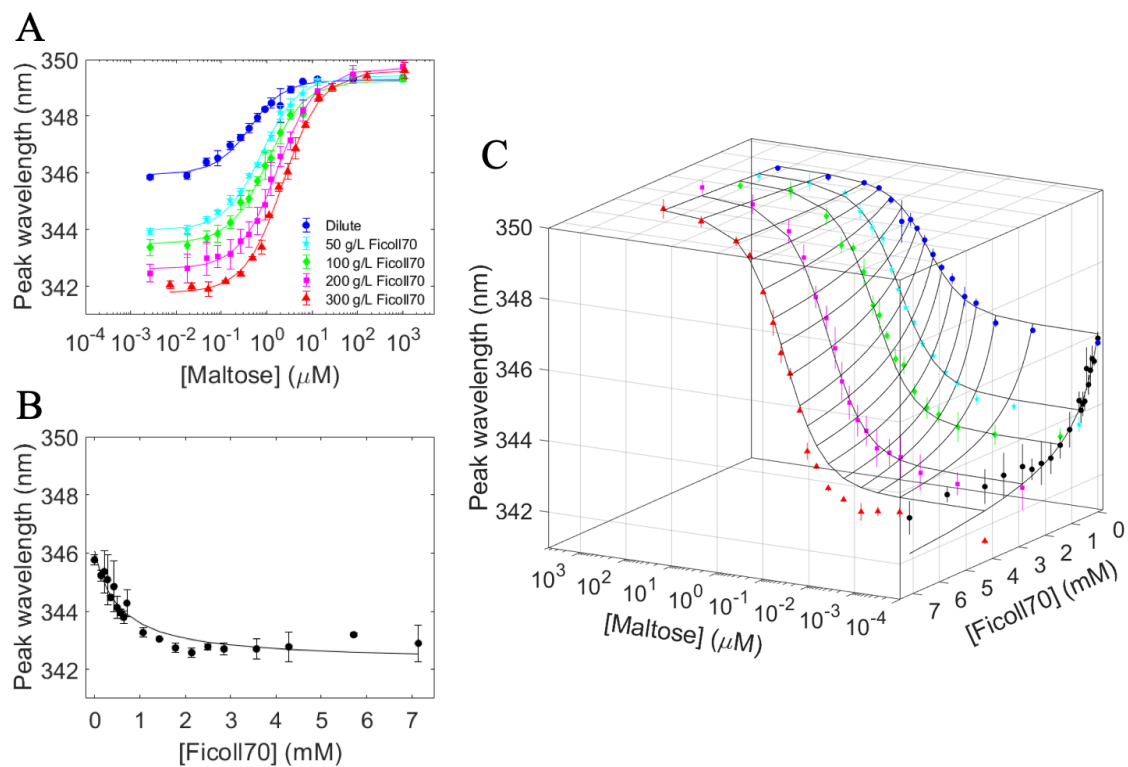

**Figure S1.** (A) Two-state fit of binding isotherms from titrating maltose into the A96F mutant in the absence or presence of fixed concentrations of Ficoll70. (B) Two-state fit of the binding isotherm from titrating Ficoll70. (C) Three-state fit of all the binding isotherms.

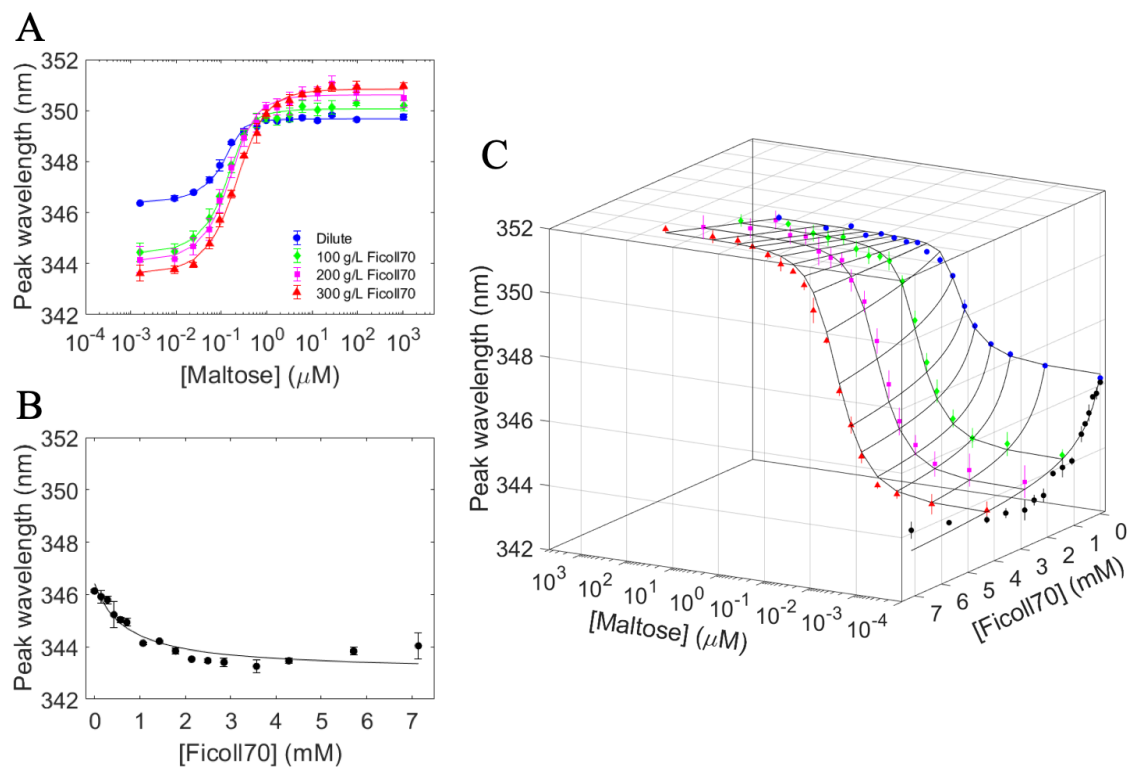

**Figure S2.** (A) Two-state fit of binding isotherms from titrating maltose into the I329W mutant in the absence or presence of fixed concentrations of Ficoll70. (B) Two-state fit of the binding isotherm from titrating Ficoll70. (C) Three-state fit of all the binding isotherms.

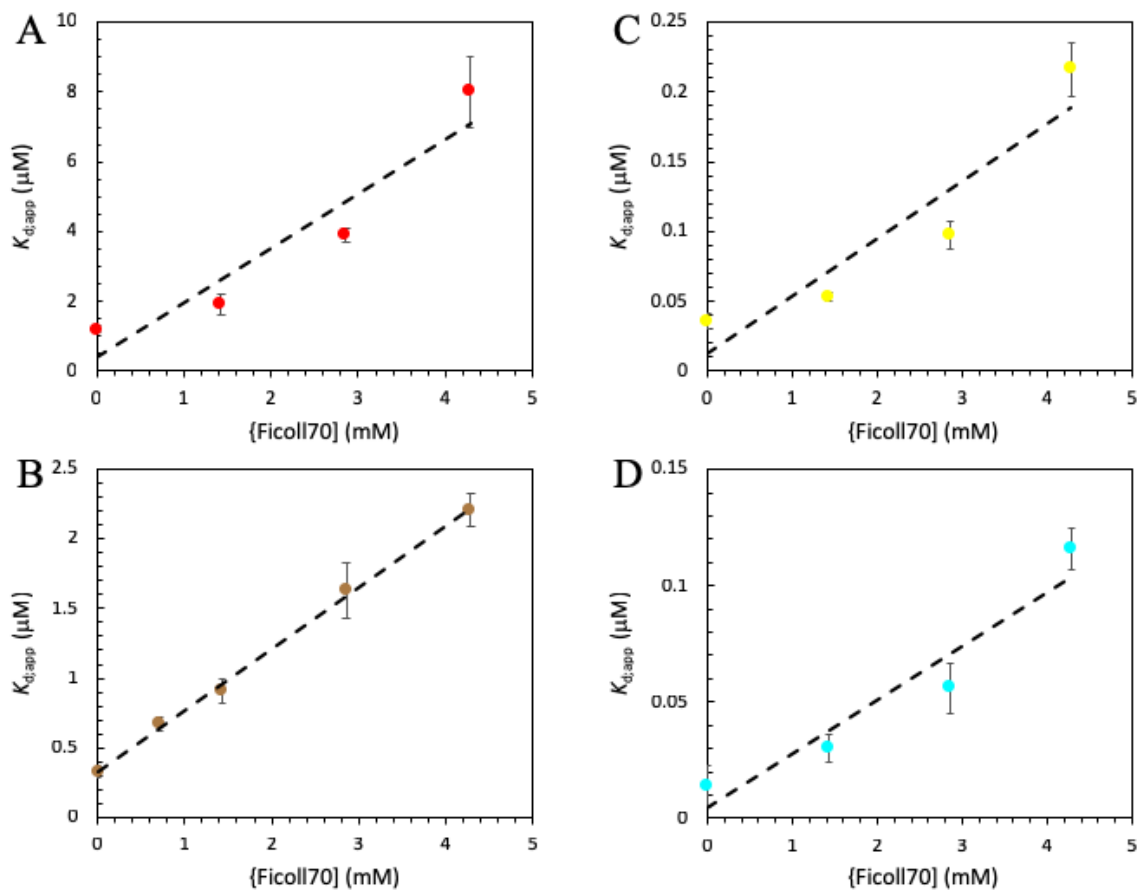

**Figure S3.** Linear dependence of the apparent maltose dissociation constants on Ficol70 concentration, expected for a three-state competitive model. (A) Wild-type MBP. (B) A96F mutant. (C) A96W mutant. (D) I329W mutant.

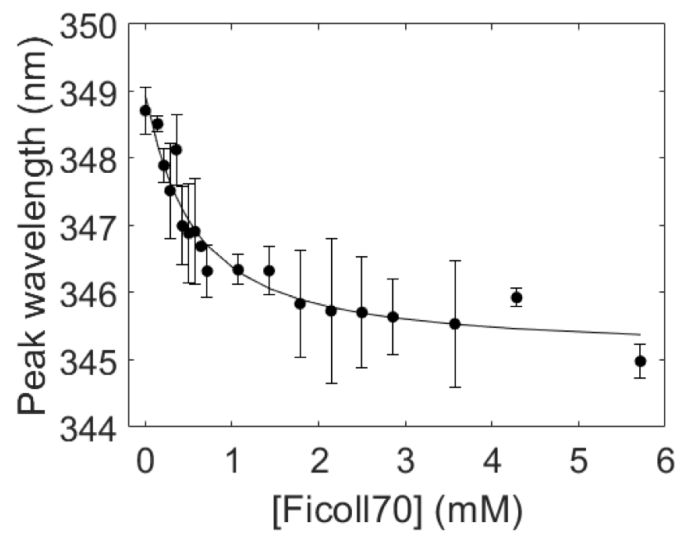

**Figure S4.** Two-state fit of the binding isotherm from titrating Ficoll70 into the A96W/I329W mutant.

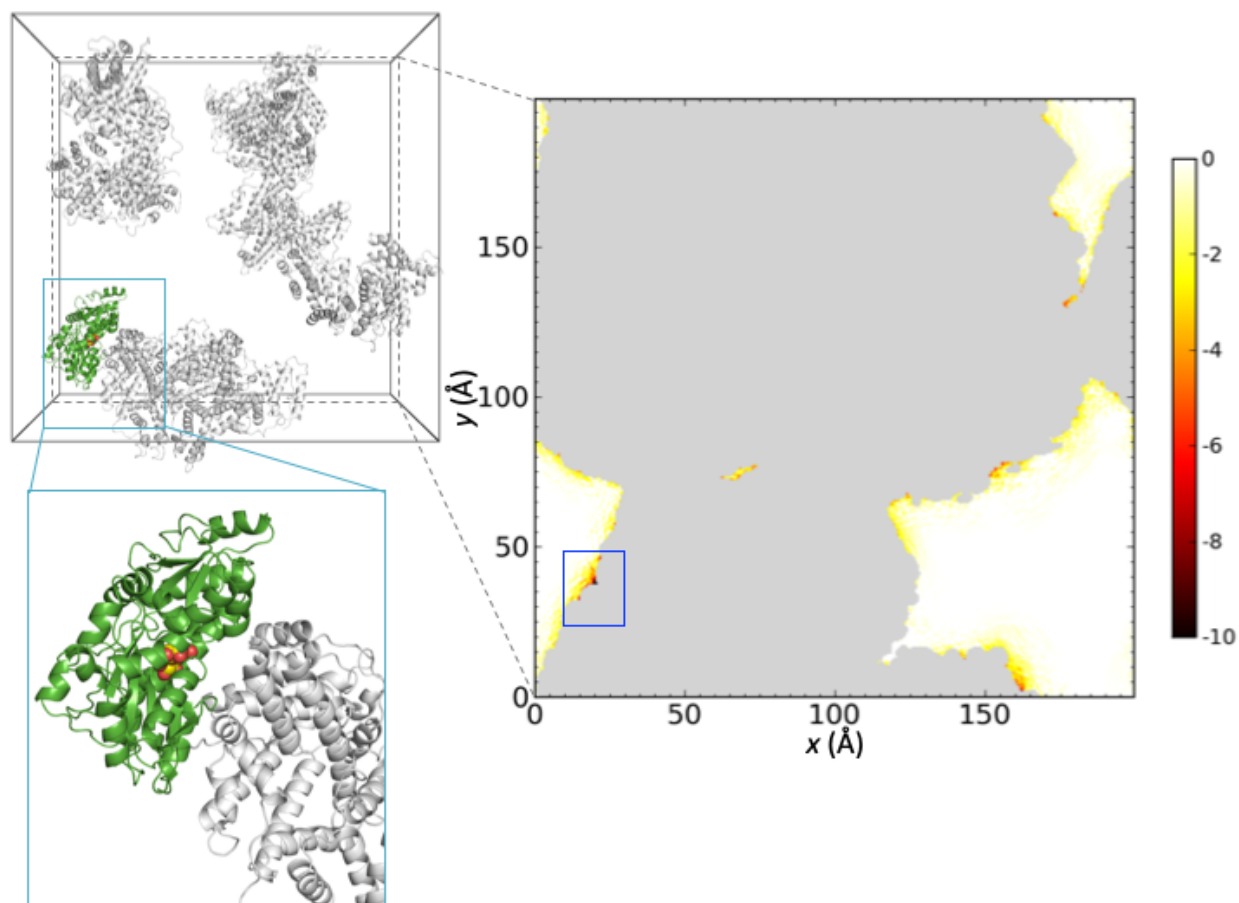

**Figure S5.** FMAP calculation of the protein-crowder interaction energies. An MBP molecule (green) is fictitiously placed into many locations inside a cubic box with side length of 200 Å containing eight BSA molecules (gray), representing a concentration of 110 g/L. The interaction energies within a slice of the crowder solution are displayed as colors according to a scale (in kcal/mol) shown on the right. The particular MBP molecule displayed is within a “hot” region (center of blue rectangle). An enlarged view of the pose with this MBP molecule docked to a neighboring BSA molecule is shown at lower bottom.



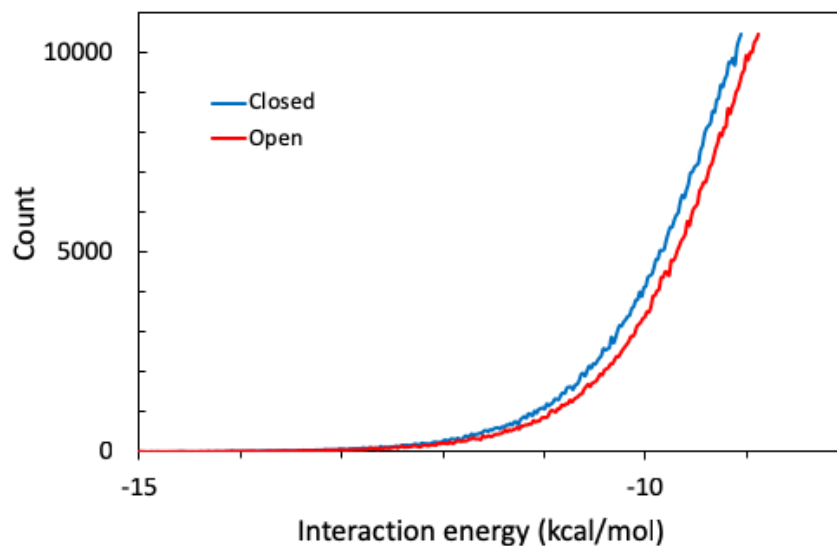

**Figure S6.** Histograms of MBP-BSA pairwise interaction energies. MBP is either in the closed form (blue curve) or open form (red curve). By the FMAP method,  $2 \times 10^6$  MBP placements in a box of BSA molecules with the lowest interaction energies were obtained. Out of these, the interaction energies were further calculated by an atom-based method and the results were collected for  $1.52 \times 10^5$  MBP placements (the remaining placements were newly found to have clashes with the crowdors). The latter results were grouped into bins with 0.02 kcal/mol width, and the count in each bin is displayed.
